# Supplementary material for: A trinuclear Zn(ii) Schiff base azido compound: synthesis, structure and exploration of antimicrobial activity
Source: Royal Society of Chemistry journal article supplement (doi:10.1039/d1nj00468a), 2021-01-01
Supplement: d1nj00468a1.pdf [file d1nj00468a1.pdf]

## Electronic Supplementary Information

### **A trinuclear Zn(II) Schiff base azido compound: synthesis, structure and exploration of antimicrobial activity**

**Mrinmoy Ghosh<sup>a</sup>, Samik Biswas<sup>b</sup>, Moumita Roy<sup>a</sup>, Saptarshi Biswas<sup>c</sup>, Pameli Ghosh<sup>d</sup>, Subratanath Koner<sup>d</sup>, Supratim Mandal<sup>b\*</sup> and Sandip Saha<sup>a\*</sup>**

*<sup>a</sup>Department of Chemistry, Acharya Prafulla Chandra College, New Barrackpur, Kolkata-700131, India*

*<sup>b</sup>Department of Microbiology, University of Kalyani, Kalyani, West Bengal 741235, India*

*<sup>c</sup>Department of Chemistry, Katwa College, Katwa, West Bengal 713130, India*

*<sup>d</sup>Department of Chemistry, Jadavpur University, Kolkata 700032, India*

\*Corresponding authors. E-mail: [sandipsaha2000@yahoo.com](mailto:sandipsaha2000@yahoo.com) ; Fax. +91-33-2537-8797 and

E-mail: [supratim.mandal@gmail.com](mailto:supratim.mandal@gmail.com)

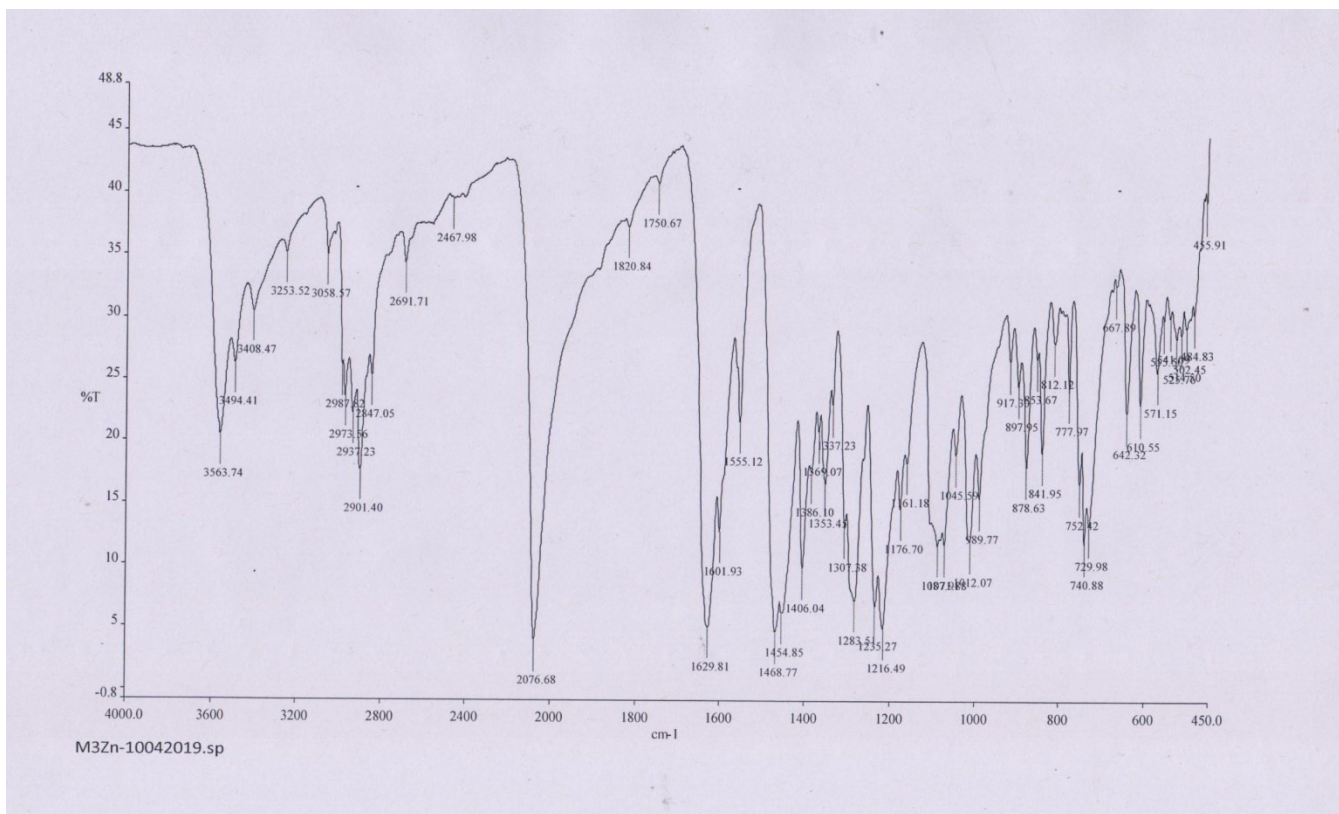

**Figure S1: FT-IR spectrum of complex 1**

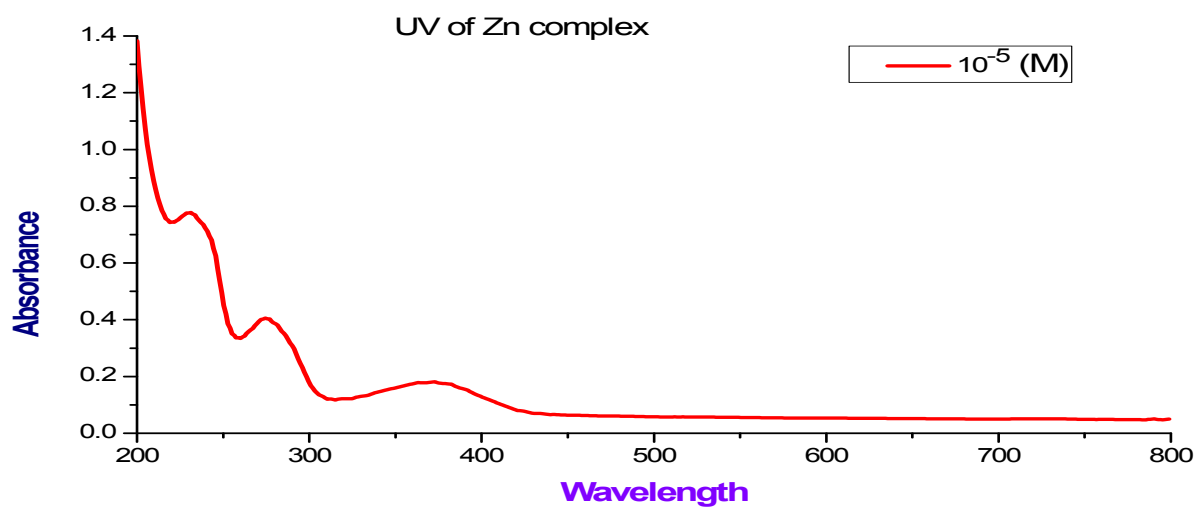

**Figure S2: UV-Vis spectrum of complex 1**

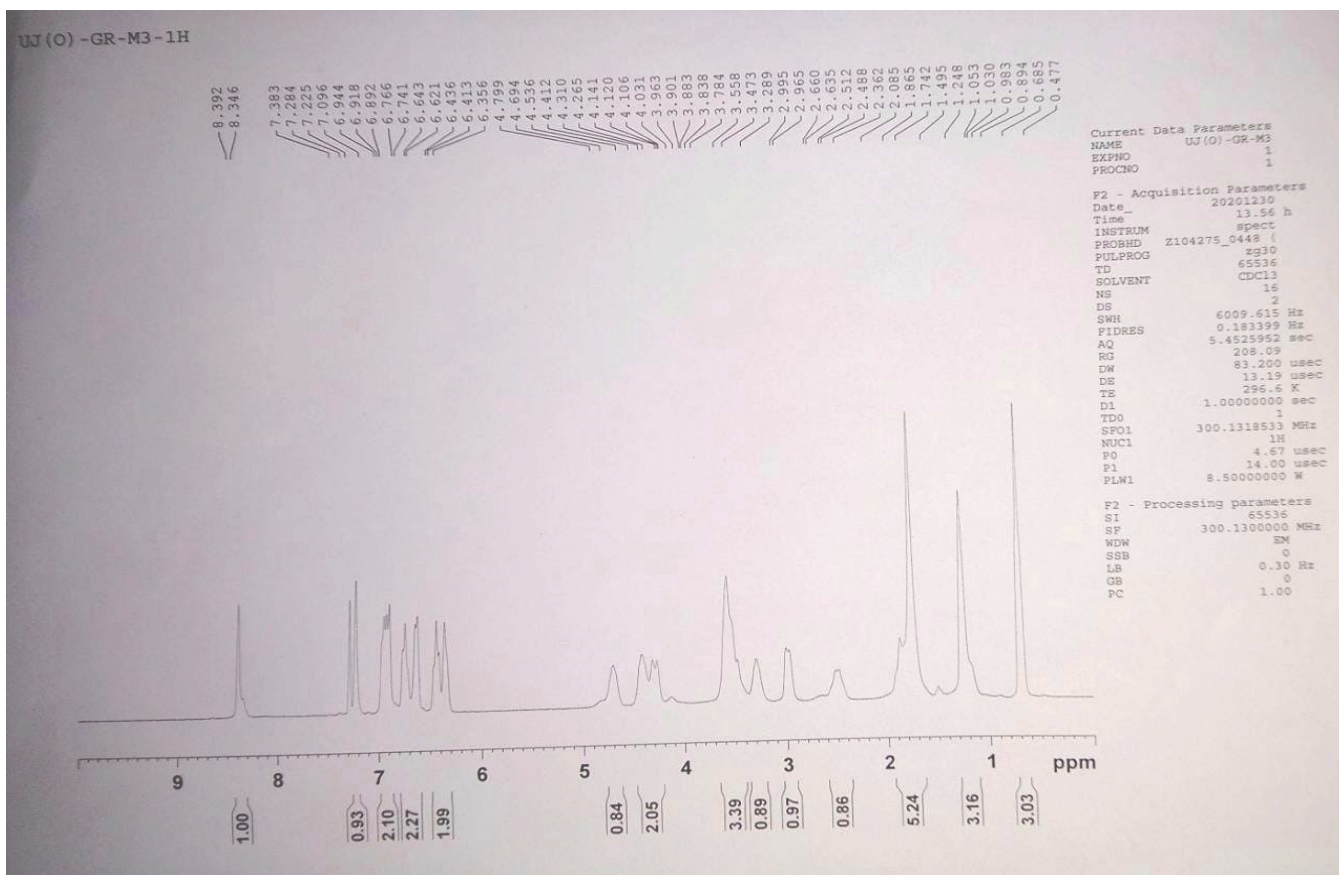

Figure S3: <sup>1</sup>H NMR spectrum of complex 1

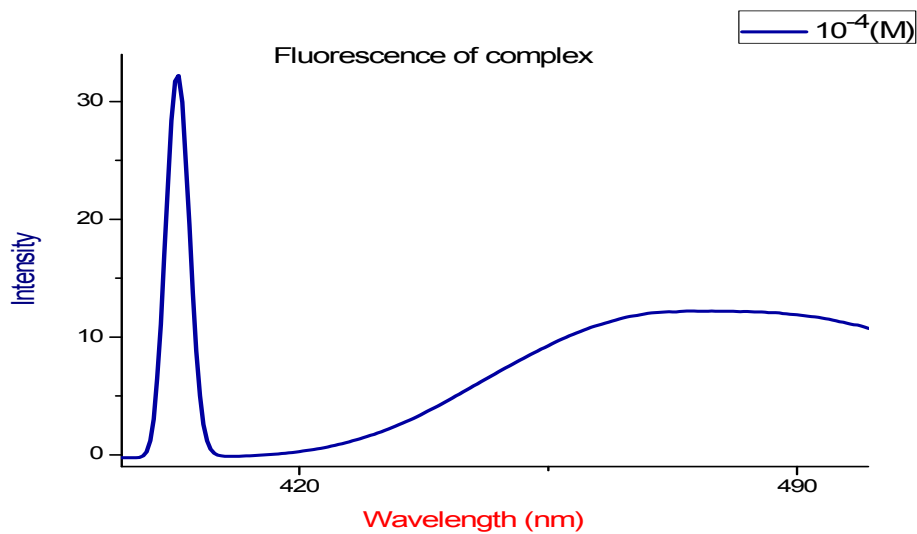

Figure S4: Fluorescence spectrum of complex 1

**Table S1.** Hydrogen bond parameters of complex **1**

| D – H...A          | D–H (Å) | H...A (Å) | D...A (Å) | ∠D–H...A (°) | Symmetry   |
|--------------------|---------|-----------|-----------|--------------|------------|
| O1W – H1WB ... N5  | 0.86(2) | 2.31(8)   | 2.895(9)  | 126(7)       | -          |
| O1W – H1WB ... O1W | 0.86(2) | 1.74(6)   | 2.463(11) | 141(9)       | -x,y,1/2-z |

**Table S2.** Minimum Inhibitory Concentration (MIC) of the Schiff base ligand only against various Gram-negative and Gram-positive strains using micro-dilution technique (µg/ml)

|               | Microorganisms                           | Description                                                               | MIC (µg/ml) |
|---------------|------------------------------------------|---------------------------------------------------------------------------|-------------|
| Gram-negative | <i>Escherichia coli</i> ATCC 25922       | Quality control strain ; Serotype O6                                      | 1500        |
|               | <i>Pseudomonas aeruginosa</i> ATCC 27853 | Quality control strain; opportunistic pathogen for both humans and plants | 1500        |
|               | <i>Salmonella typhimurium</i> ATCC 14028 | Wild-type                                                                 | 1500        |
| Gram-positive | <i>Staphylococcus aureus</i> MTCC 96     | Methicillin-susceptable <i>S.aureus</i> (MSSA)                            | 1500        |
|               | <i>Enterococcus faecalis</i> ATCC 29212  | Vancomycin susceptible <i>E. faecalis</i> (VSE)                           | 1500        |
|               | <i>Bacillus subtilis</i> ATCC 27370      | M 168; spore forming Bacilli                                              | 1500        |
